# Supplementary material
Source: publisher figshare collection journal article supplement (https://acs.figshare.com/ndownloader/files/3921358)
Supplement: Supplementary file 1 [file 3921358]

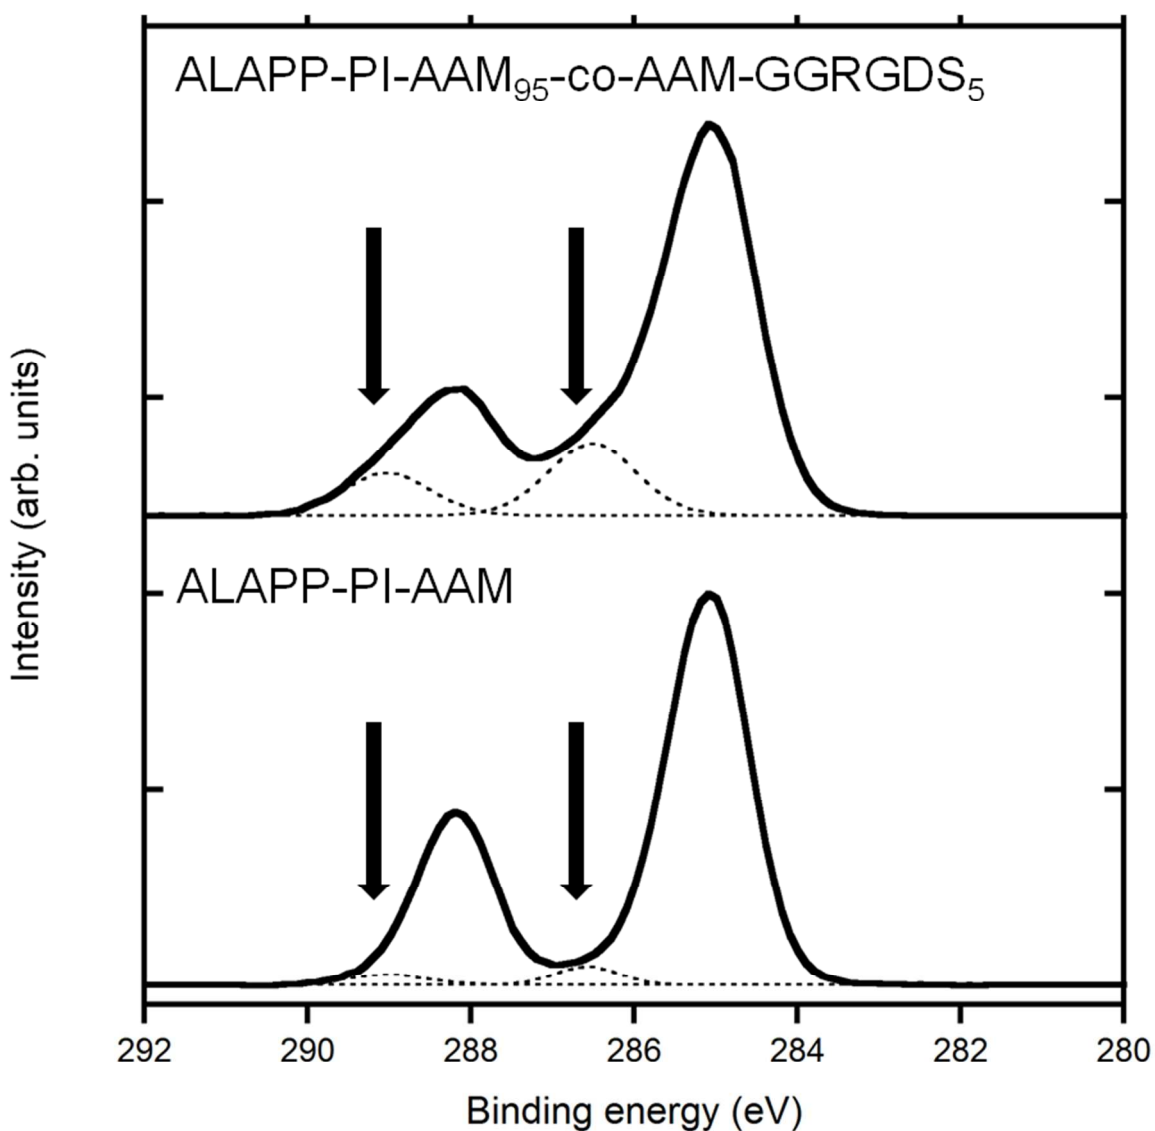

**Figure S 1.** High resolution C1s spectra of ALAPP-PI-AAM and ALAPP-PI-AAM<sub>95</sub>-co-AAM-GGRGDS<sub>5</sub> with arrows showing the difference in spectral shape due to the increase of the C3 component at ~287 eV and C5 component at ~289 eV.

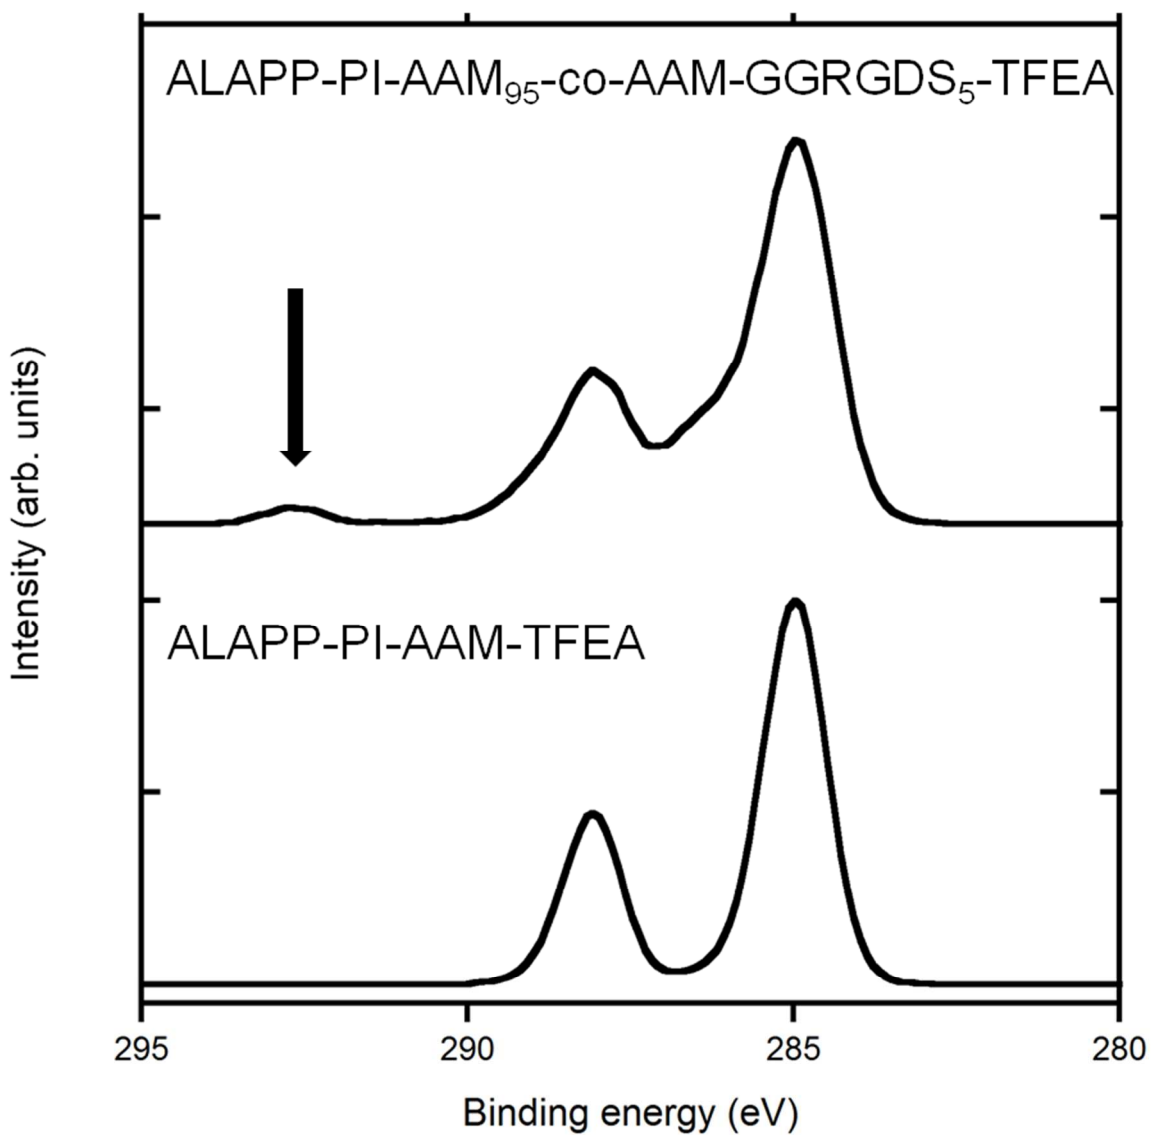

**Figure S 2.** High resolution C1s spectra of ALAPP-PI-AAM and ALAPP-PI-AAM<sub>95</sub>-co-AAM-GGRGDS<sub>5</sub> coatings after TFEA labelling with the arrow indicating the highly shifted C6 component due to introduction of CF<sub>3</sub> groups in the coating.
